# Supplementary material for: Adenovirus prime, Env protein boost vaccine protects against neutralization-resistant SIVsmE660 variants in rhesus monkeys
Source: PubMed Central journal article supplement (PMC5465370; doi:10.1038/ncomms15740), 2017-06-05
Supplement: ncomms15740-s1.pdf [file ncomms15740-s1.pdf]

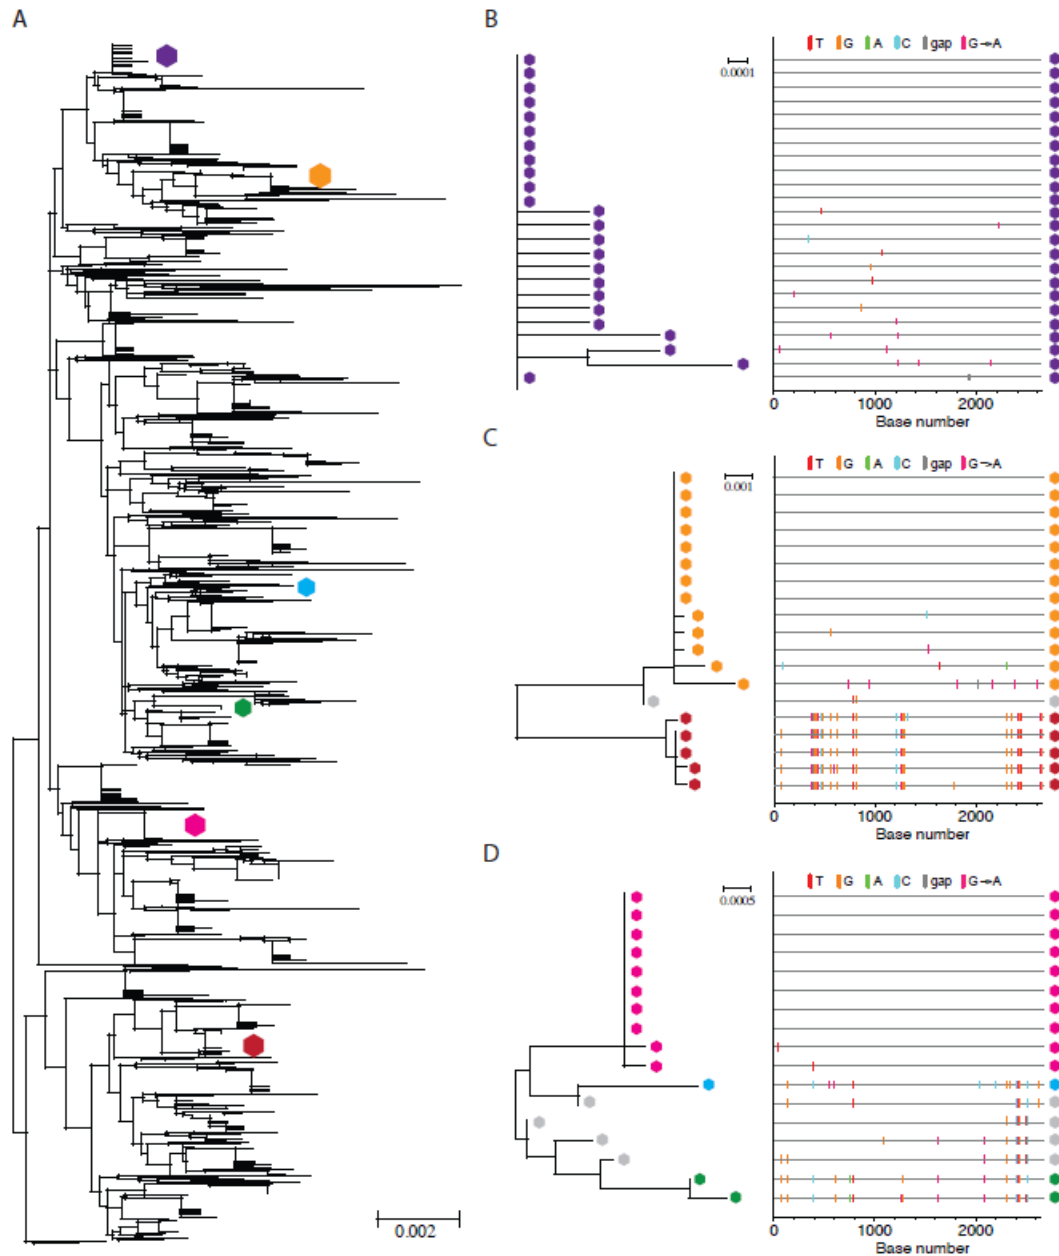

**Supplementary Figure 1. Variant enumeration.** Composite tree (A) and representative tree and highlighter alignments (B-D) demonstrate the ability to discriminate animals infected with a single T/F genomes (B), two TF variants (C) or three T/F variants (D). Each T/F lineage is color coded and mapped onto the composite tree. Recombinant genomes are identified phylogenetically and are shown in grey. Individual polymorphisms are shown as individual tick-marks in alignment.

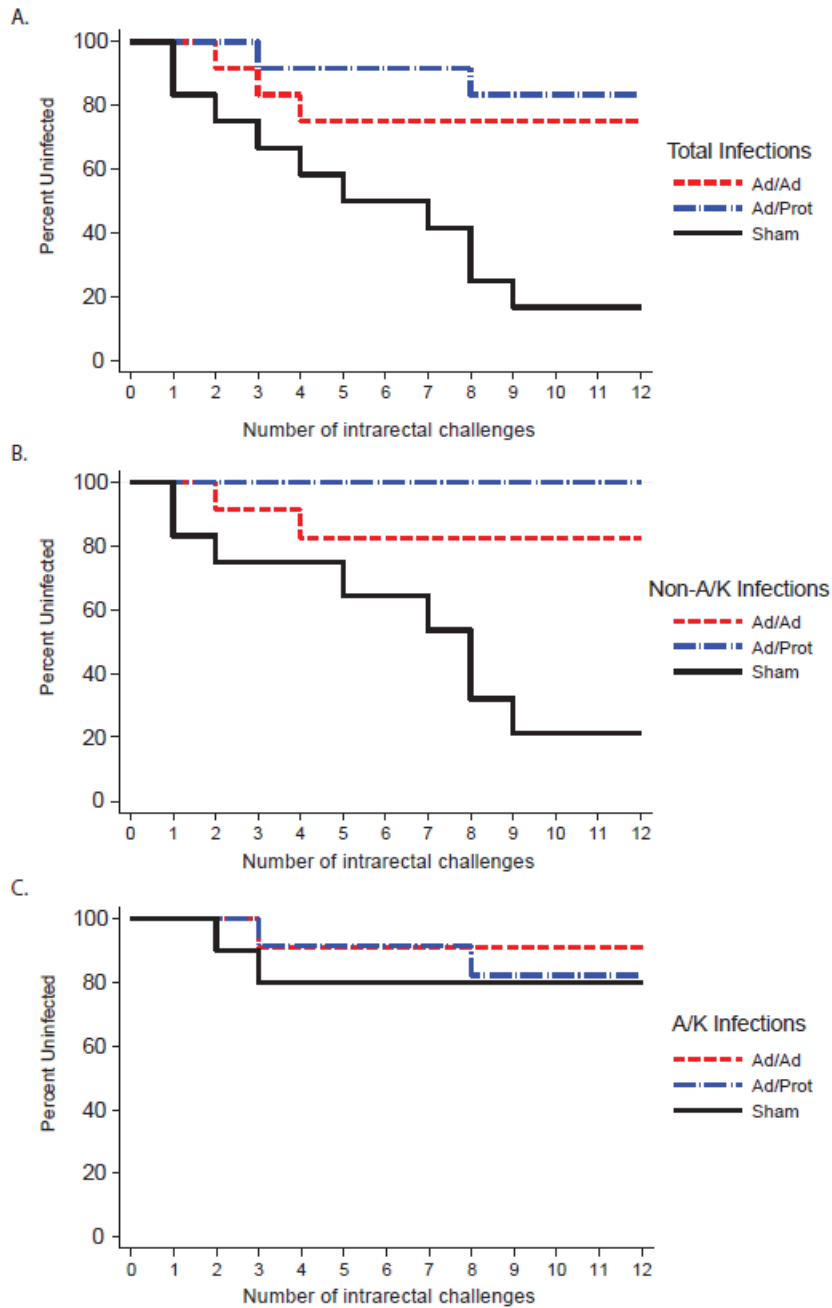

**Supplementary Figure 2. Protective efficacy stratified by neutralization resistance in the RLD challenge study.** The number of challenges required for detection of productive infection for each vaccine group separated into all T/F genomes (A), non-A/K (B), and A/K (C). Kaplan-Meier plots denote the percent of uninfected animals after each challenge. Ad/Env (blue) indicates animals primed with Ad35/Ad26 and boosted with adjuvanted Env gp140 (Ad35/Ad26/Env). Ad/Ad (red) indicates animals vaccinated with Ad35/Ad26 only.

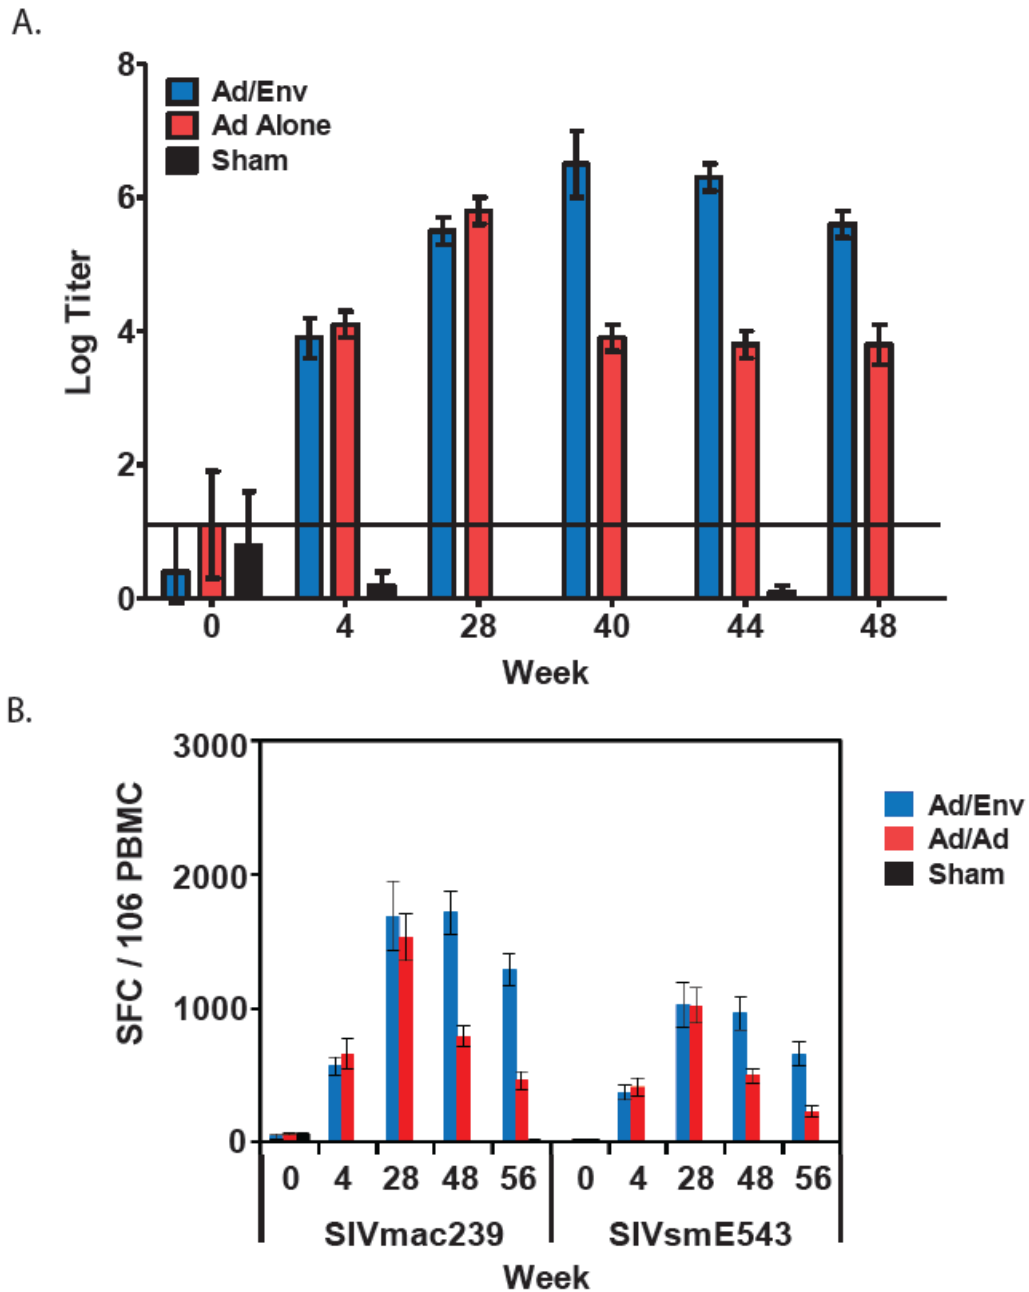

**Supplementary Figure 3. Humoral and cellular immune responses in the SHD challenge study.** Vaccine-induced binding antibodies titers (N=10/group) were determined by SIVmac251 Env ELISA at week 0, 4, 28, 40, 44, and 48 following vaccination (A). Cellular immune responses to SIVmac239 and SIVsmE543 Gag, Pol, and Env were determined by IFN- $\gamma$  ELISPOT assay at weeks 0, 4, 28, 48, and 56 and reported as spot-forming cells (SFC) per million peripheral blood mononuclear cells (PBMC). Ad/Env (blue) indicates animals primed with Ad35/Ad26 and boosted with adjuvanted Env gp140 (Ad35/Ad26/Env). Ad/Ad (red) indicates animals vaccinated with Ad35/Ad26 only. Sham controls (black) were vaccinated with Ad35/Ad26 expressing no relevant antigens. Error bars represent standard error of mean (SEM).

**Supplementary Table 1. Immunologic data**

**Log ELISA Titer (RLD Challenge Study)**

| Ad/Env | Ad   | Ad/Env | Ad   | Ad/Env | Ad    | Ad/Env | Ad    | Ad/Env | Ad    | Ad/Env | Ad    |
|--------|------|--------|------|--------|-------|--------|-------|--------|-------|--------|-------|
| Wk 0   | Wk 0 | Wk 4   | Wk 4 | Wk 28  | Wk 28 | Wk 40  | Wk 40 | Wk 44  | Wk 44 | Wk 48  | Wk 48 |
| 0.0    | 0.0  | 4.3    | 4.8  | 5.8    | 5.3   | 6.3    | 4.8   | 6.3    | 5.3   | 5.8    | 4.8   |
| 0.0    | 0.0  | 4.3    | 4.3  | 5.8    | 5.3   | 6.3    | 5.3   | 5.8    | 5.3   | 6.3    | 5.3   |
| 0.0    | 0.0  | 4.3    | 4.8  | 5.8    | 5.3   | 6.7    | 4.8   | 5.8    | 5.3   | 6.3    | 4.8   |
| 0.0    | 0.0  | 4.3    | 4.3  | 5.8    | 5.8   | 6.7    | 4.8   | 5.8    | 5.3   | 6.7    | 5.3   |
| 0.0    | 0.0  | 3.8    | 3.8  | 5.8    | 5.3   | 6.7    | 4.8   | 5.8    | 4.8   | 6.3    | 4.8   |
| 0.0    | 0.0  | 4.3    | 3.8  | 5.8    | 5.3   | 6.3    | 4.8   | 5.8    | 5.3   | 5.8    | 4.8   |
| 0.0    | 0.0  | 3.8    | 4.3  | 5.8    | 5.8   | 6.3    | 5.3   | 6.3    | 5.3   | 6.3    | 5.3   |
| 0.0    | 0.0  | 4.3    | 4.3  | 5.8    | 5.3   | 6.3    | 4.8   | 5.8    | 4.8   | 6.7    | 4.8   |
| 0.0    | 0.0  | 4.3    | 4.3  | 5.3    | 5.8   | 5.8    | 4.8   | 5.8    | 5.3   | 5.3    | 5.3   |
| 0.0    | 0.0  | 4.3    | 4.3  | 6.3    | 5.8   | 6.3    | 5.3   | 5.8    | 5.8   | 5.3    | 5.3   |
| 0.0    | 0.0  | 3.8    | 3.8  | 5.3    | 5.3   | 5.8    | 5.3   | 5.8    | 5.3   | 5.8    | 5.3   |
| 0.0    | 0.0  | 4.3    | 4.3  | 6.7    | 5.3   | 6.3    | 5.3   | 5.8    | 4.8   | 6.3    | 5.3   |

**Log ELISA Titer (SHD Challenge Study)**

| Ad/Env | Ad   | Ad/Env | Ad   | Ad/Env | Ad    | Ad/Env | Ad    | Ad/Env | Ad    | Ad/Env | Ad    |
|--------|------|--------|------|--------|-------|--------|-------|--------|-------|--------|-------|
| Wk 0   | Wk 0 | Wk 4   | Wk 4 | Wk 28  | Wk 28 | Wk 40  | Wk 40 | Wk 44  | Wk 44 | Wk 48  | Wk 48 |
| 0.0    | 1.4  | 3.8    | 3.8  | 5.3    | 5.8   | 6.7    | 3.8   | 6.7    | 3.8   | 5.8    | 3.8   |
| 1.4    | 1.4  | 3.8    | 3.8  | 5.8    | 6.3   | 6.7    | 3.8   | 6.3    | 3.8   | 5.8    | 3.8   |
| 0.0    | 1.4  | 3.8    | 4.8  | 5.8    | 5.3   | 6.3    | 3.8   | 6.3    | 3.8   | 5.3    | 3.8   |
| 0.0    | 0.0  | 4.3    | 4.3  | 5.3    | 5.3   | 6.7    | 3.8   | 6.3    | 3.8   | 6.3    | 3.8   |
| 1.4    | 1.4  | 4.3    | 3.8  | 5.8    | 5.8   | 5.8    | 3.8   | 5.8    | 4.3   | 5.3    | 3.8   |
| 0.0    | 1.4  | 3.8    | 4.3  | 5.8    | 5.8   | 6.3    | 4.8   | 6.3    | 4.3   | 5.8    | 4.8   |
| 0.0    | 1.4  | 3.8    | 4.3  | 5.3    | 5.3   | 6.3    | 3.8   | 6.3    | 3.8   | 5.3    | 3.8   |
| 0.0    | 0.0  | 3.8    | 3.8  | 5.8    | 5.8   | 5.8    | 3.8   | 5.8    | 3.8   | 5.3    | 3.8   |
| 0.0    | 1.4  | 3.8    | 3.8  | 5.3    | 5.3   | 6.7    | 4.3   | 6.3    | 3.8   | 5.8    | 4.3   |
| 1.4    | 1.4  | 3.8    | 4.3  | 5.3    | 6.3   | 6.7    | 3.8   | 6.7    | 3.8   | 5.8    | 3.8   |

**Raw ELISPOT Data (Spot-Forming Cells / 200,000 PBMC)  
Week 0**

**Ad/Ad**

| R10 | Median        |                |                |                |                |              |               |               |               |               | Data |        |               |                |                |                |                |              |               |               |               |               |      |
|-----|---------------|----------------|----------------|----------------|----------------|--------------|---------------|---------------|---------------|---------------|------|--------|---------------|----------------|----------------|----------------|----------------|--------------|---------------|---------------|---------------|---------------|------|
|     | SIVmac239 Gag | SIVmac239 Env1 | SIVmac239 Env2 | SIVmac239 Pol1 | SIVmac239 Pol2 | SIVsm543 Gag | SIVsm543 Env1 | SIVsm543 Env2 | SIVsm543 Pol1 | SIVsm543 Pol2 | PHAM | R10    | SIVmac239 Gag | SIVmac239 Env1 | SIVmac239 Env2 | SIVmac239 Pol1 | SIVmac239 Pol2 | SIVsm543 Gag | SIVsm543 Env1 | SIVsm543 Env2 | SIVsm543 Pol1 | SIVsm543 Pol2 | PHAM |
| 2   | 0             | 0              | 2              | 2              | 2              | 1            | 2             | 1             | 1             | 1             | 903  | 218-10 | 4             | 0              | 0              | 1              | 2              | 1            | 1             | 0             | 1             | 1             | 889  |
| 3   | 5             | 4              | 6              | 13             | 12             | 4            | 3             | 2             | 1             | 5             | 476  | 219-10 | 9             | 0              | 0              | 5              | 9              | 3            | 2             | 2             | 1             | 1             | 937  |
| 2   | 2             | 2              | 1              | 5              | 6              | 2            | 0             | 2             | 2             | 2             | 495  | 220-10 | 3             | 2              | 3              | 5              | 17             | 3            | 5             | 1             | 1             | 1             | 977  |
| 1   | 1             | 1              | 3              | 4              | 3              | 2            | 1             | 2             | 2             | 2             | 468  | 221-10 | 2             | 8              | 4              | 6              | 9              | 14           | 5             | 0             | 2             | 1             | 974  |
| 4   | 4             | 5              | 4              | 5              | 2              | 2            | 2             | 2             | 2             | 5             | 471  | 222-10 | 2             | 1              | 3              | 0              | 4              | 10           | 1             | 0             | 2             | 1             | 976  |
| 3   | 1             | 2              | 1              | 6              | 7              | 2            | 2             | 2             | 0             | 1             | 389  | 223-10 | 2             | 0              | 2              | 0              | 2              | 4            | 4             | 2             | 1             | 2             | 957  |
| 2   | 1             | 2              | 3              | 11             | 16             | 2            | 3             | 3             | 1             | 6             | 499  | 224-10 | 0             | 2              | 0              | 5              | 8              | 1            | 0             | 3             | 3             | 3             | 976  |
| 1   | 2             | 3              | 1              | 9              | 3              | 1            | 2             | 2             | 3             | 2             | 392  | 225-10 | 3             | 4              | 2              | 6              | 3              | 4            | 1             | 3             | 0             | 1             | 977  |
| 3   | 1             | 4              | 3              | 11             | 3              | 2            | 1             | 7             | 0             | 1             | 616  | 226-10 | 1             | 1              | 1              | 1              | 5              | 6            | 1             | 1             | 3             | 2             | 944  |
| 4   | 2             | 2              | 4              | 4              | 1              | 5            | 4             | 4             | 3             | 4             | 540  | 227-10 | 3             | 5              | 4              | 5              | 6              | 5            | 2             | 1             | 3             | 2             | 944  |
|     |               |                |                |                |                |              |               |               |               |               |      | 228-10 | 4             | 1              | 2              | 1              | 8              | 2            | 2             | 1             | 0             | 1             | 934  |
|     |               |                |                |                |                |              |               |               |               |               |      | 229-10 | 3             | 1              | 3              | 1              | 10             | 17           | 2             | 2             | 1             | 0             | 930  |
|     |               |                |                |                |                |              |               |               |               |               |      | 230-10 | 0             | 0              | 1              | 1              | 10             | 14           | 1             | 4             | 4             | 2             | 978  |
|     |               |                |                |                |                |              |               |               |               |               |      | 231-10 | 2             | 1              | 2              | 1              | 9              | 2            | 0             | 1             | 3             | 2             | 988  |
|     |               |                |                |                |                |              |               |               |               |               |      | 232-10 | 0             | 0              | 3              | 0              | 8              | 3            | 1             | 2             | 1             | 3             | 996  |
|     |               |                |                |                |                |              |               |               |               |               |      | 233-10 | 2             | 0              | 5              | 1              | 4              | 2            | 2             | 1             | 7             | 0             | 936  |
|     |               |                |                |                |                |              |               |               |               |               |      | 234-10 | 3             | 2              | 2              | 5              | 17             | 3            | 2             | 6             | 0             | 1             | 936  |
|     |               |                |                |                |                |              |               |               |               |               |      | 235-10 | 3             | 2              | 3              | 6              | 1              | 2            | 3             | 5             | 4             | 1             | 941  |
|     |               |                |                |                |                |              |               |               |               |               |      | 236-10 | 4             | 1              | 2              | 6              | 1              | 0            | 7             | 4             | 1             | 5             | 938  |

**Ad/Env**

| R10 | Median        |                |                |                |                |              |               |               |               |               | Data |        |               |                |                |                |                |              |               |               |               |               |      |
|-----|---------------|----------------|----------------|----------------|----------------|--------------|---------------|---------------|---------------|---------------|------|--------|---------------|----------------|----------------|----------------|----------------|--------------|---------------|---------------|---------------|---------------|------|
|     | SIVmac239 Gag | SIVmac239 Env1 | SIVmac239 Env2 | SIVmac239 Pol1 | SIVmac239 Pol2 | SIVsm543 Gag | SIVsm543 Env1 | SIVsm543 Env2 | SIVsm543 Pol1 | SIVsm543 Pol2 | PHAM | R10    | SIVmac239 Gag | SIVmac239 Env1 | SIVmac239 Env2 | SIVmac239 Pol1 | SIVmac239 Pol2 | SIVsm543 Gag | SIVsm543 Env1 | SIVsm543 Env2 | SIVsm543 Pol1 | SIVsm543 Pol2 | PHAM |
| 2   | 4             | 5              | 5              | 11             | 8              | 2            | 1             | 2             | 1             | 1             | 551  | 219-10 | 2             | 4              | 2              | 5              | 10             | 8            | 2             | 1             | 2             | 2             | 955  |
| 4   | 5             | 3              | 2              | 18             | 8              | 2            | 2             | 2             | 2             | 3             | 535  | 220-10 | 7             | 4              | 7              | 4              | 12             | 7            | 1             | 1             | 1             | 1             | 936  |
| 1   | 4             | 25             | 3              | 53             | 16             | 2            | 2             | 5             | 2             | 1             | 777  | 221-10 | 4             | 1              | 3              | 2              | 9              | 9            | 2             | 3             | 0             | 1             | 923  |
| 4   | 1             | 1              | 1              | 13             | 12             | 1            | 1             | 2             | 3             | 2             | 417  | 222-10 | 3             | 0              | 2              | 1              | 27             | 7            | 0             | 3             | 2             | 4             | 946  |
| 1   | 4             | 4              | 2              | 4              | 3              | 2            | 1             | 3             | 2             | 1             | 337  | 223-10 | 1             | 4              | 0              | 4              | 20             | 11           | 1             | 0             | 2             | 2             | 929  |
| 3   | 4             | 2              | 3              | 2              | 4              | 3            | 5             | 3             | 1             | 4             | 541  | 224-10 | 1             | 3              | 49             | 2              | 36             | 19           | 3             | 1             | 7             | 1             | 925  |
| 1   | 1             | 2              | 2              | 17             | 1              | 2            | 14            | 1             | 0             | 2             | 578  | 225-10 | 3             | 1              | 1              | 1              | 26             | 12           | 0             | 1             | 2             | 3             | 948  |
| 2   | 2             | 4              | 5              | 55             | 17             | 2            | 4             | 2             | 2             | 3             | 372  | 226-10 | 5             | 1              | 1              | 0              | 9              | 12           | 1             | 0             | 1             | 1             | 986  |
| 6   | 5             | 4              | 5              | 9              | 5              | 2            | 6             | 8             | 3             | 3             | 574  | 227-10 | 1             | 1              | 2              | 3              | 24             | 2            | 1             | 26            | 2             | 0             | 944  |
| 4   | 2             | 2              | 2              | 2              | 1              | 2            | 4             | 3             | 3             | 1             | 556  | 228-10 | 3             | 2              | 5              | 2              | 85             | 21           | 0             | 4             | 0             | 1             | 936  |
|     |               |                |                |                |                |              |               |               |               |               |      | 229-10 | 0             | 2              | 2              | 7              | 66             | 19           | 3             | 3             | 2             | 2             | 938  |
|     |               |                |                |                |                |              |               |               |               |               |      | 230-10 | 11            | 7              | 7              | 2              | 13             | 7            | 1             | 8             | 9             | 3             | 982  |
|     |               |                |                |                |                |              |               |               |               |               |      | 231-10 | 1             | 3              | 1              | 7              | 5              | 2            | 2             | 4             | 2             | 4             | 989  |
|     |               |                |                |                |                |              |               |               |               |               |      | 232-10 | 1             | 3              | 4              | 2              | 2              | 1            | 2             | 3             | 4             | 2             | 950  |
|     |               |                |                |                |                |              |               |               |               |               |      | 233-10 | 3             | 1              | 0              | 2              | 1              | 1            | 1             | 4             | 2             | 3             | 952  |

**Sham**

| R10 | Median        |                |                |                |                |              |               |               |               |               | Data |        |               |                |                |                |                |              |               |               |               |               |      |
|-----|---------------|----------------|----------------|----------------|----------------|--------------|---------------|---------------|---------------|---------------|------|--------|---------------|----------------|----------------|----------------|----------------|--------------|---------------|---------------|---------------|---------------|------|
|     | SIVmac239 Gag | SIVmac239 Env1 | SIVmac239 Env2 | SIVmac239 Pol1 | SIVmac239 Pol2 | SIVsm543 Gag | SIVsm543 Env1 | SIVsm543 Env2 | SIVsm543 Pol1 | SIVsm543 Pol2 | PHAM | R10    | SIVmac239 Gag | SIVmac239 Env1 | SIVmac239 Env2 | SIVmac239 Pol1 | SIVmac239 Pol2 | SIVsm543 Gag | SIVsm543 Env1 | SIVsm543 Env2 | SIVsm543 Pol1 | SIVsm543 Pol2 | PHAM |
| 2   | 1             | 2              | 1              | 4              | 1              | 0            | 1             | 0             | 1             | 0             | 261  | 217-10 | 2             | 1              | 2              | 0              | 6              | 1            | 0             | 1             | 0             | 1             | 909  |
| 6   | 4             | 2              | 4              | 48             | 47             | 2            | 4             | 6             | 3             | 2             | 498  | 218-10 | 1             | 1              | 1              | 1              | 2              | 1            | 0             | 0             | 0             | 0             | 972  |
| 2   | 1             | 1              | 1              | 2              | 3              | 3            | 0             | 3             | 1             | 2             | 482  | 219-10 | 3             | 5              | 1              | 6              | 54             | 47           | 3             | 3             | 11            | 3             | 926  |
| 8   | 5             | 7              | 3              | 20             | 20             | 4            | 4             | 2             | 5             | 9             | 599  | 220-10 | 3             | 1              | 1              | 0              | 42             | 46           | 0             | 4             | 1             | 0             | 969  |
| 1   | 4             | 1              | 0              | 1              | 3              | 3            | 9             | 1             | 2             | 0             | 490  | 221-10 | 1             | 1              | 1              | 0              | 2              | 5            | 1             | 0             | 3             | 0             | 900  |
| 4   | 2             | 2              | 2              | 1              | 2              | 2            | 2             | 2             | 2             | 2             | 526  | 222-10 | 2             | 0              | 1              | 1              | 5              | 1            | 4             | 0             | 2             | 1             | 962  |
| 2   | 0             | 0              | 2              | 2              | 2              | 2            | 2             | 1             | 2             | 2             | 470  | 223-10 | 6             | 2              | 5              | 4              | 29             | 19           | 4             | 3             | 5             | 5             | 959  |
| 2   | 2             | 1              | 1              | 1              | 1              | 1            | 1             | 3             | 2             | 1             | 470  | 224-10 | 0             | 2              | 0              | 0              | 2              | 4            | 3             | 57            | 0             | 0             | 983  |
| 2   | 1             | 2              | 1              | 0              | 1              | 3            | 0             | 2             | 3             | 3             | 479  | 225-10 | 2             | 1              | 2              | 0              | 10             | 20           | 3             | 5             | 1             | 4             | 991  |
| 2   | 3             | 4              | 1              | 6              | 3              | 3            | 4             | 3             | 3             | 3             | 605  | 226-10 | 2             | 2              | 0              | 2              | 2              | 4            | 3             | 3             | 37            | 0             | 983  |
|     |               |                |                |                |                |              |               |               |               |               |      | 227-10 | 2             | 1              | 2              | 1              | 0              | 2            | 4             | 1             | 3             | 1             | 989  |
|     |               |                |                |                |                |              |               |               |               |               |      | 228-10 | 5             | 3              | 2              | 3              | 1              | 2            | 2             | 1             | 1             | 6             | 997  |
|     |               |                |                |                |                |              |               |               |               |               |      | 229-10 | 1             | 0              | 0              | 0              | 2              | 3            | 1             | 0             | 0             | 1             | 955  |
|     |               |                |                |                |                |              |               |               |               |               |      | 230-10 | 1             | 0              | 0              | 1              | 0              | 0            | 2             | 2             | 2             | 2             | 937  |
|     |               |                |                |                |                |              |               |               |               |               |      | 231-10 | 2             | 0              | 0              | 1              | 1              | 0            | 2             | 0             | 2             | 2             | 964  |
|     |               |                |                |                |                |              |               |               |               |               |      | 232-10 | 1             | 1              | 1              | 1              | 1              | 2            | 0             | 1             | 3             | 2             | 976  |
|     |               |                |                |                |                |              |               |               |               |               |      | 233-10 | 2             | 0              | 2              | 1              | 0              | 1            | 4             | 0             | 0             | 3             | 981  |
|     |               |                |                |                |                |              |               |               |               |               |      | 234-10 | 1             | 2              | 2              | 1              | 0              | 1            | 2             | 0             | 3             | 2             | 977  |
|     |               |                |                |                |                |              |               |               |               |               |      | 235-10 | 0             | 3              | 6              | 1              | 6              | 3            | 3             | 2             | 2             | 1             | 928  |
|     |               |                |                |                |                |              |               |               |               |               |      | 236-10 | 3             | 1              | 1              | 1              | 6              | 3            | 2             | 1             | 3             | 2             | 981  |

**Raw ELISPOT Data (Spot-Forming Cells / 200,000 PBMC)**  
**Week 4**

**Ad/Ad**

| Median |               |                |                |                |                |              |               |               |               |               |      | Data   |               |                |                |                |                |              |               |               |               |               |      |     |
|--------|---------------|----------------|----------------|----------------|----------------|--------------|---------------|---------------|---------------|---------------|------|--------|---------------|----------------|----------------|----------------|----------------|--------------|---------------|---------------|---------------|---------------|------|-----|
| R10    | SIVmac239 Gag | SIVmac239 Env1 | SIVmac239 Env2 | SIVmac239 Pol1 | SIVmac239 Pol2 | SIVsm543 Gag | SIVsm543 Env1 | SIVsm543 Env2 | SIVsm543 Pol1 | SIVsm543 Pol2 | PHAM | R10    | SIVmac239 Gag | SIVmac239 Env1 | SIVmac239 Env2 | SIVmac239 Pol1 | SIVmac239 Pol2 | SIVsm543 Gag | SIVsm543 Env1 | SIVsm543 Env2 | SIVsm543 Pol1 | SIVsm543 Pol2 | PHAM |     |
| 0      | 146           | 17             | 14             | 12             | 7              | 131          | 6             | 4             | 20            | 5             | 713  | 218-10 | 0             | 155            | 16             | 12             | 14             | 6            | 128           | 6             | 15            | 3             | 693  |     |
| 1      | 15            | 65             | 3              | 71             | 5              | 14           | 26            | 12            | 43            | 0             | 488  | 218-10 | 0             | 157            | 83             | 15             | 10             | 6            | 124           | 4             | 24            | 0             | 728  |     |
| 1      | 30            | 165            | 10             | 46             | 93             | 27           | 14            | 11            | 44            | 21            | 456  | 220-10 | 0             | 35             | 25             | 1              | 61             | 1            | 18            | 35            | 13            | 42            | 0    | 488 |
| 1      | 129           | 13             | 17             | 5              | 3              | 89           | 4             | 9             | 2             | 1             | 448  | 220-10 | 0             | 35             | 67             | 5              | 81             | 9            | 9             | 17            | 11            | 41            | 0    | 487 |
| 0      | 13            | 9              | 7              | 1              | 1              | 17           | 5             | 2             | 3             | 1             | 203  | 222-10 | 1             | 25             | 124            | 0              | 42             | 26           | 37            | 15            | 6             | 15            | 0    | 509 |
| 1      | 71            | 22             | 11             | 5              | 7              | 69           | 12            | 13            | 1             | 4             | 389  | 222-10 | 1             | 37             | 175            | 9              | 49             | 87           | 27            | 15            | 13            | 38            | 1    | 442 |
| 1      | 10            | 13             | 15             | 8              | 14             | 9            | 8             | 18            | 4             | 4             | 548  | 223-10 | 0             | 121            | 13             | 17             | 6              | 3            | 88            | 4             | 11            | 3             | 1    | 454 |
| 1      | 23            | 13             | 6              | 11             | 5              | 10           | 7             | 8             | 7             | 4             | 383  | 223-10 | 0             | 117            | 13             | 16             | 3              | 3            | 79            | 4             | 7             | 1             | 1    | 441 |
| 0      | 13            | 8              | 8              | 7              | 1              | 8            | 2             | 3             | 8             | 2             | 382  | 226-10 | 0             | 11             | 10             | 1              | 1              | 1            | 20            | 4             | 2             | 2             | 1    | 147 |
| 14     | 76            | 46             | 32             | 28             | 34             | 63           | 34            | 28            | 15            | 36            | 448  | 226-10 | 0             | 25             | 7              | 9              | 0              | 1            | 13            | 3             | 1             | 3             | 1    | 238 |
|        |               |                |                |                |                |              |               |               |               |               |      | 227-10 | 1             | 66             | 15             | 10             | 0              | 6            | 67            | 11            | 13            | 3             | 6    | 381 |
|        |               |                |                |                |                |              |               |               |               |               |      | 227-10 | 1             | 76             | 29             | 11             | 4              | 8            | 71            | 13            | 12            | 0             | 2    | 385 |
|        |               |                |                |                |                |              |               |               |               |               |      | 229-10 | 1             | 8              | 15             | 17             | 10             | 14           | 8             | 7             | 17            | 4             | 2    | 331 |
|        |               |                |                |                |                |              |               |               |               |               |      | 229-10 | 1             | 12             | 11             | 13             | 5              | 13           | 10            | 8             | 18            | 4             | 4    | 548 |
|        |               |                |                |                |                |              |               |               |               |               |      | 239-10 | 0             | 23             | 10             | 7              | 10             | 6            | 9             | 10            | 5             | 7             | 2    | 421 |
|        |               |                |                |                |                |              |               |               |               |               |      | 244-10 | 0             | 22             | 15             | 5              | 11             | 4            | 11            | 10            | 6             | 9             | 1    | 345 |
|        |               |                |                |                |                |              |               |               |               |               |      | 244-10 | 0             | 9              | 8              | 10             | 6              | 1            | 7             | 1             | 2             | 6             | 1    | 347 |
|        |               |                |                |                |                |              |               |               |               |               |      | 245-10 | 0             | 17             | 8              | 6              | 8              | 1            | 9             | 9             | 3             | 10            | 9    | 417 |
|        |               |                |                |                |                |              |               |               |               |               |      | 245-10 | 14            | 64             | 39             | 37             | 23             | 39           | 60            | 32            | 27            | 17            | 28   | 488 |
|        |               |                |                |                |                |              |               |               |               |               |      | 245-10 | 14            | 68             | 52             | 26             | 33             | 29           | 66            | 26            | 29            | 13            | 43   | 428 |

**Ad/Env**

| Median |               |                |                |                |                |              |               |               |               |               |      | Data   |               |                |                |                |                |              |               |               |               |               |      |     |
|--------|---------------|----------------|----------------|----------------|----------------|--------------|---------------|---------------|---------------|---------------|------|--------|---------------|----------------|----------------|----------------|----------------|--------------|---------------|---------------|---------------|---------------|------|-----|
| R10    | SIVmac239 Gag | SIVmac239 Env1 | SIVmac239 Env2 | SIVmac239 Pol1 | SIVmac239 Pol2 | SIVsm543 Gag | SIVsm543 Env1 | SIVsm543 Env2 | SIVsm543 Pol1 | SIVsm543 Pol2 | PHAM | R10    | SIVmac239 Gag | SIVmac239 Env1 | SIVmac239 Env2 | SIVmac239 Pol1 | SIVmac239 Pol2 | SIVsm543 Gag | SIVsm543 Env1 | SIVsm543 Env2 | SIVsm543 Pol1 | SIVsm543 Pol2 | PHAM |     |
| 1      | 23            | 16             | 11             | 5              | 8              | 11           | 5             | 19            | 7             | 13            | 549  | 219-10 | 0             | 16             | 19             | 8              | 6              | 7            | 10            | 5             | 15            | 9             | 11   | 534 |
| 1      | 42            | 63             | 41             | 32             | 12             | 24           | 31            | 34            | 14            | 5             | 557  | 219-10 | 1             | 29             | 16             | 13             | 4              | 9            | 11            | 5             | 22            | 7             | 7    | 513 |
| 2      | 39            | 55             | 12             | 6              | 5              | 47           | 20            | 4             | 8             | 6             | 511  | 221-10 | 0             | 41             | 63             | 17             | 37             | 17           | 34            | 41            | 10            | 3             | 1    | 576 |
| 1      | 73            | 16             | 17             | 44             | 15             | 73           | 2             | 13            | 45            | 8             | 555  | 221-10 | 1             | 49             | 63             | 45             | 28             | 6            | 21            | 28            | 28            | 18            | 0    | 537 |
| 1      | 13            | 19             | 31             | 9              | 4              | 10           | 14            | 16            | 9             | 12            | 507  | 225-10 | 2             | 37             | 65             | 13             | 4              | 1            | 48            | 20            | 6             | 7             | 8    | 528 |
| 2      | 143           | 35             | 58             | 13             | 47             | 129          | 7             | 29            | 4             | 33            | 601  | 230-10 | 2             | 40             | 43             | 11             | 3              | 4            | 46            | 20            | 4             | 8             | 4    | 494 |
| 2      | 7             | 16             | 30             | 6              | 5              | 4            | 4             | 6             | 5             | 4             | 468  | 230-10 | 1             | 84             | 28             | 18             | 45             | 13           | 82            | 9             | 12            | 10            | 7    | 576 |
| 0      | 14            | 15             | 11             | 28             | 21             | 12           | 6             | 13            | 22            | 13            | 367  | 230-10 | 0             | 61             | 17             | 15             | 47             | 16           | 64            | 0             | 13            | 40            | 0    | 512 |
| 6      | 32            | 21             | 18             | 24             | 10             | 19           | 5             | 3             | 15            | 2             | 552  | 233-10 | 3             | 14             | 11             | 23             | 3              | 2            | 5             | 9             | 14            | 14            | 11   | 496 |
| 3      | 6             | 11             | 4              | 4              | 5              | 4            | 3             | 4             | 6             | 2             | 449  | 234-10 | 0             | 12             | 26             | 38             | 14             | 6            | 15            | 19            | 17            | 4             | 13   | 517 |
|        |               |                |                |                |                |              |               |               |               |               |      | 234-10 | 3             | 156            | 39             | 53             | 16             | 37           | 118           | 6             | 29            | 2             | 32   | 601 |
|        |               |                |                |                |                |              |               |               |               |               |      | 235-10 | 1             | 139            | 30             | 63             | 10             | 56           | 140           | 7             | 29            | 6             | 34   | 601 |
|        |               |                |                |                |                |              |               |               |               |               |      | 235-10 | 0             | 8              | 15             | 30             | 2              | 3            | 4             | 2             | 2             | 0             | 0    | 479 |
|        |               |                |                |                |                |              |               |               |               |               |      | 235-10 | 3             | 8              | 17             | 29             | 2              | 3            | 4             | 6             | 9             | 9             | 9    | 479 |
|        |               |                |                |                |                |              |               |               |               |               |      | 231-10 | 0             | 10             | 5              | 13             | 15             | 17           | 13            | 5             | 16            | 20            | 9    | 342 |
|        |               |                |                |                |                |              |               |               |               |               |      | 240-10 | 0             | 28             | 26             | 9              | 60             | 24           | 13            | 7             | 9             | 21            | 17   | 392 |
|        |               |                |                |                |                |              |               |               |               |               |      | 240-10 | 8             | 29             | 15             | 13             | 16             | 9            | 16            | 7             | 3             | 14            | 2    | 569 |
|        |               |                |                |                |                |              |               |               |               |               |      | 246-10 | 3             | 25             | 27             | 22             | 32             | 10           | 21            | 2             | 15            | 2             | 2    | 524 |
|        |               |                |                |                |                |              |               |               |               |               |      | 246-10 | 5             | 7              | 15             | 3              | 8              | 2            | 3             | 4             | 4             | 2             | 3    | 457 |
|        |               |                |                |                |                |              |               |               |               |               |      | 246-10 | 1             | 4              | 7              | 4              | 0              | 7            | 4             | 9             | 3             | 9             | 1    | 440 |

**Sham**

| Median |               |                |                |                |                |              |               |               |               |               |      | Data   |               |                |                |                |                |              |               |               |               |               |      |     |
|--------|---------------|----------------|----------------|----------------|----------------|--------------|---------------|---------------|---------------|---------------|------|--------|---------------|----------------|----------------|----------------|----------------|--------------|---------------|---------------|---------------|---------------|------|-----|
| R10    | SIVmac239 Gag | SIVmac239 Env1 | SIVmac239 Env2 | SIVmac239 Pol1 | SIVmac239 Pol2 | SIVsm543 Gag | SIVsm543 Env1 | SIVsm543 Env2 | SIVsm543 Pol1 | SIVsm543 Pol2 | PHAM | R10    | SIVmac239 Gag | SIVmac239 Env1 | SIVmac239 Env2 | SIVmac239 Pol1 | SIVmac239 Pol2 | SIVsm543 Gag | SIVsm543 Env1 | SIVsm543 Env2 | SIVsm543 Pol1 | SIVsm543 Pol2 | PHAM |     |
| 0      | 1             | 1              | 1              | 1              | 0              | 1            | 2             | 0             | 3             | 0             | 46   | 217-10 | 0             | 0              | 1              | 0              | 0              | 0            | 1             | 0             | 2             | 0             | 0    | 18  |
| 1      | 1             | 1              | 1              | 0              | 2              | 0            | 0             | 0             | 1             | 1             | 409  | 217-10 | 0             | 0              | 1              | 1              | 0              | 0            | 0             | 1             | 0             | 4             | 0    | 14  |
| 1      | 1             | 0              | 0              | 0              | 1              | 0            | 0             | 0             | 1             | 1             | 263  | 224-10 | 1             | 1              | 2              | 1              | 0              | 2            | 0             | 0             | 0             | 1             | 1    | 408 |
| 1      | 3             | 6              | 2              | 1              | 1              | 1            | 4             | 0             | 1             | 1             | 414  | 228-10 | 2             | 0              | 0              | 0              | 2              | 0            | 0             | 0             | 0             | 2             | 0    | 410 |
| 1      | 1             | 1              | 0              | 0              | 1              | 0            | 1             | 1             | 0             | 0             | 420  | 228-10 | 0             | 1              | 0              | 0              | 0              | 0            | 0             | 0             | 0             | 0             | 1    | 291 |
| 0      | 0             | 0              | 1              | 2              | 1              | 0            | 0             | 1             | 1             | 0             | 392  | 230-10 | 1             | 1              | 5              | 3              | 0              | 2            | 1             | 0             | 3             | 0             | 1    | 412 |
| 0      | 1             | 0              | 1              | 0              | 2              | 1            | 1             | 1             | 1             | 1             | 218  | 236-10 | 1             | 1              | 0              | 0              | 0              | 1            | 0             | 1             | 0             | 0             | 0    | 490 |
| 0      | 1             | 0              | 1              | 0              | 2              | 1            | 1             | 1             | 1             | 1             | 218  | 236-10 | 1             | 0              | 0              | 0              | 0              | 1            | 0             | 1             | 0             | 0             | 0    | 490 |
| 0      | 1             | 1              | 0              | 1              | 0              | 0            | 0             | 0             | 0             | 1             | 183  | 237-10 | 0             | 0              | 0              | 0              | 0              | 1            | 0             | 0             | 1             | 0             | 0    | 355 |
| 0      | 0             | 1              | 0              | 1              | 0              | 1            | 0             | 1             | 1             | 0             | 332  | 237-10 | 0             | 0              | 0              | 1              | 4              | 0            | 0             | 0             | 1             | 1             | 0    | 428 |
| 2      | 2             | 1              | 1              | 0              | 0              | 1            | 0             | 1             | 1             | 0             | 349  | 238-10 | 0             | 0              | 0              | 0              | 0              | 0            | 1             | 0             | 1             | 0             | 0    | 193 |
|        |               |                |                |                |                |              |               |               |               |               |      | 241-10 | 0             | 0              | 1              | 0              | 0              | 0            | 0             | 0             | 1             | 0             | 0    | 187 |
|        |               |                |                |                |                |              |               |               |               |               |      | 242-10 | 0             | 0              | 0              | 0              | 1              | 0            | 0             | 0             | 1             | 0             | 0    | 242 |
|        |               |                |                |                |                |              |               |               |               |               |      | 241-10 | 0             | 1              | 0              | 0              | 0              | 0            | 0             | 0             | 0             | 0             | 1    | 179 |
|        |               |                |                |                |                |              |               |               |               |               |      | 242-10 | 0             | 0              | 0              | 0              | 0              | 0            | 0             | 0             | 0             | 0             | 0    | 187 |
|        |               |                |                |                |                |              |               |               |               |               |      | 242-10 | 0             | 0              | 1              | 0              | 0              | 0            | 0             | 0             | 0             | 0             | 0    | 275 |
|        |               |                |                |                |                |              |               |               |               |               |      | 243-10 | 2             | 1              | 0              | 1              | 0              | 0            | 2             | 0             | 1             | 0             | 0    | 345 |
|        |               |                |                |                |                |              |               |               |               |               |      | 243-10 | 3             | 0              | 1              | 1              | 0              | 0            | 0             | 0             | 0             | 1             | 0    | 353 |

**Raw ELISPOT Data (Spot-Forming Cells / 200,000 PBMC)**  
**Week 28**

**Ad/Ad**

| Median |               |                |                |                |                |              |               |               |               |               | Data |        |               |                |                |                |                |              |               |               |               |               |      |    |
|--------|---------------|----------------|----------------|----------------|----------------|--------------|---------------|---------------|---------------|---------------|------|--------|---------------|----------------|----------------|----------------|----------------|--------------|---------------|---------------|---------------|---------------|------|----|
| R10    | SIVmac239 Gag | SIVmac239 Env1 | SIVmac239 Env2 | SIVmac239 Pol1 | SIVmac239 Pol2 | SIVsm543 Gag | SIVsm543 Env1 | SIVsm543 Env2 | SIVsm543 Pol1 | SIVsm543 Pol2 | PHAM | R10    | SIVmac239 Gag | SIVmac239 Env1 | SIVmac239 Env2 | SIVmac239 Pol1 | SIVmac239 Pol2 | SIVsm543 Gag | SIVsm543 Env1 | SIVsm543 Env2 | SIVsm543 Pol1 | SIVsm543 Pol2 | PHAM |    |
| 1      | 198           | 38             | 26             | 48             | 17             | 178          | 4             | 22            | 32            | 11            | *    | 218-10 | 1             | 192            | 37             | 28             | 52             | 11           | 167           | 4             | 25            | 36            | 5    | *  |
| 0      | 66            | 278            | 2              | 230            | 9              | 17           | 148           | 13            | 201           | 1             | **   | 218-10 | 0             | 263            | 283            | 23             | 22             | 189          | 4             | 22            | 24            | 17            | **   |    |
| 1      | 22            | 185            | 6              | 46             | 116            | 26           | 15            | 1             | 30            | 8             | **   | 220-10 | 0             | 59             | 283            | 2              | 224            | 15           | 155           | 12            | 192           | 0             | **   |    |
| 1      | 156           | 30             | 32             | 43             | 16             | 137          | 12            | 23            | 41            | 10            | **   | 220-10 | 0             | 53             | 273            | 2              | 236            | 10           | 139           | 13            | 209           | 1             | *    |    |
| 1      | 76            | 45             | 13             | 12             | 7              | 62           | 19            | 15            | 5             | 11            | **   | 222-10 | 0             | 20             | 180            | 5              | 51             | 113          | 18            | 20            | 0             | 20            | 8    | ** |
| 17     | 121           | 77             | 57             | 38             | 22             | 91           | 42            | 32            | 17            | 20            | **   | 223-10 | 0             | 158            | 32             | 31             | 38             | 18           | 153           | 12            | 20            | 45            | 5    | *  |
| 1      | 18            | 26             | 47             | 24             | 41             | 13           | 8             | 44            | 17            | 9             | **   | 223-10 | 0             | 155            | 78             | 33             | 48             | 14           | 121           | 11            | 20            | 37            | 14   | *  |
| 1      | 15            | 21             | 43             | 19             | 8              | 9            | 7             | 14            | 18            | 1             | **   | 226-10 | 0             | 25             | 42             | 10             | 16             | 1            | 55            | 12            | 12            | 7             | 8    | *  |
| 1      | 45            | 47             | 48             | 34             | 5              | 31           | 34            | 76            | 17            | 2             | **   | 226-10 | 1             | 77             | 48             | 16             | 7              | 10           | 68            | 20            | 17            | 3             | 13   | *  |
| 0      | 72            | 45             | 57             | 17             | 68             | 73           | 27            | 9             | 3             | 59            | *    | 227-10 | 0             | 139            | 86             | 50             | 28             | 16           | 82            | 40            | 18            | 17            | 17   | ** |
|        |               |                |                |                |                |              |               |               |               |               |      | 227-10 | 28            | 131            | 69             | 64             | 36             | 28           | 89            | 42            | 26            | 16            | 26   | *  |
|        |               |                |                |                |                |              |               |               |               |               |      | 229-10 | 0             | 16             | 25             | 43             | 20             | 51           | 8             | 7             | 36            | 16            | 8    | *  |
|        |               |                |                |                |                |              |               |               |               |               |      | 229-10 | 1             | 20             | 26             | 53             | 27             | 30           | 18            | 8             | 52            | 18            | 0    | *  |
|        |               |                |                |                |                |              |               |               |               |               |      | 244-10 | 0             | 44             | 19             | 42             | 16             | 11           | 9             | 6             | 13            | 23            | 4    | *  |
|        |               |                |                |                |                |              |               |               |               |               |      | 244-10 | 1             | 36             | 23             | 24             | 21             | 5            | 27            | 37            | 24            | 12            | 1    | *  |
|        |               |                |                |                |                |              |               |               |               |               |      | 245-10 | 0             | 49             | 47             | 60             | 20             | 3            | 37            | 31            | 82            | 18            | 1    | *  |
|        |               |                |                |                |                |              |               |               |               |               |      | 245-10 | 0             | 49             | 47             | 56             | 37             | 7            | 34            | 35            | 76            | 16            | 2    | *  |
|        |               |                |                |                |                |              |               |               |               |               |      | 245-10 | 0             | 79             | 44             | 66             | 20             | 71           | 83            | 31            | 10            | 4             | 52   | *  |
|        |               |                |                |                |                |              |               |               |               |               |      | 245-10 | 0             | 64             | 45             | 47             | 13             | 65           | 82            | 23            | 7             | 1             | 66   | *  |

**Ad/Env**

| Median |               |                |                |                |                |              |               |               |               |               | Data |        |               |                |                |                |                |              |               |               |               |               |      |    |    |
|--------|---------------|----------------|----------------|----------------|----------------|--------------|---------------|---------------|---------------|---------------|------|--------|---------------|----------------|----------------|----------------|----------------|--------------|---------------|---------------|---------------|---------------|------|----|----|
| R10    | SIVmac239 Gag | SIVmac239 Env1 | SIVmac239 Env2 | SIVmac239 Pol1 | SIVmac239 Pol2 | SIVsm543 Gag | SIVsm543 Env1 | SIVsm543 Env2 | SIVsm543 Pol1 | SIVsm543 Pol2 | PHAM | R10    | SIVmac239 Gag | SIVmac239 Env1 | SIVmac239 Env2 | SIVmac239 Pol1 | SIVmac239 Pol2 | SIVsm543 Gag | SIVsm543 Env1 | SIVsm543 Env2 | SIVsm543 Pol1 | SIVsm543 Pol2 | PHAM |    |    |
| 1      | 15            | 25             | 21             | 8              | 15             | 11           | 6             | 23            | 11            | 9             | *    | 219-10 | 0             | 14             | 27             | 13             | 7              | 16           | 12            | 4             | 20            | 10            | 13   | ** |    |
| 2      | 185           | 163            | 364            | 57             | 48             | 138          | 99            | 43            | 26            | 46            | *    | 221-10 | 2             | 190            | 182            | 152            | 60             | 56           | 146           | 117           | 44            | 30            | 51   | *  |    |
| 0      | 70            | 84             | 16             | 33             | 51             | 84           | 50            | 17            | 23            | 40            | **   | 225-10 | 0             | 119            | 143            | 175            | 54             | 39           | 129           | 80            | 27            | 22            | 43   | ** |    |
| 0      | 173           | 19             | 41             | 72             | 8              | 198          | 4             | 12            | 50            | 17            | **   | 230-10 | 0             | 72             | 77             | 12             | 37             | 17           | 87            | 53            | 9             | 25            | 49   | *  |    |
| 1      | 16            | 7              | 23             | 18             | 12             | 5            | 5             | 2             | 8             | 4             | **   | 232-10 | 0             | 193            | 16             | 48             | 48             | 31           | 8             | 192           | 4             | 12            | 53   | 29 | ** |
| 0      | 336           | 59             | 145            | 77             | 308            | 320          | 22            | 43            | 42            | 201           | *    | 234-10 | 0             | 331            | 57             | 163            | 79             | 310          | 135           | 22            | 44            | 37            | 195  | *  |    |
| 1      | 32            | 73             | 62             | 47             | 18             | 22           | 35            | 48            | 20            | 12            | **   | 235-10 | 0             | 349            | 60             | 127            | 25             | 306          | 304           | 22            | 41            | 46            | 207  | *  |    |
| 1      | 24            | 28             | 35             | 88             | 70             | 30           | 19            | 15            | 14            | 52            | **   | 235-10 | 1             | 27             | 86             | 56             | 40             | 26           | 14            | 24            | 45            | 21            | 12   | *  |    |
| 2      | 118           | 67             | 31             | 60             | 13             | 96           | 18            | 19            | 34            | 2             | **   | 231-10 | 0             | 26             | 31             | 37             | 100            | 88           | 30            | 20            | 13            | 15            | 41   | *  |    |
| 0      | 51            | 222            | 26             | 35             | 41             | 27           | 17            | 6             | 30            | 8             | *    | 240-10 | 2             | 124            | 64             | 34             | 55             | 14           | 103           | 38            | 23            | 37            | 0    | *  |    |
|        |               |                |                |                |                |              |               |               |               |               |      | 246-10 | 0             | 111            | 26             | 27             | 86             | 11           | 88            | 18            | 14            | 80            | 6    | ** |    |
|        |               |                |                |                |                |              |               |               |               |               |      | 246-10 | 0             | 54             | 213            | 25             | 40             | 42           | 32            | 19            | 6             | 35            | 6    | *  |    |
|        |               |                |                |                |                |              |               |               |               |               |      | 246-10 | 0             | 47             | 230            | 27             | 29             | 39           | 21            | 15            | 5             | 25            | 10   | *  |    |

**Sham**

| Median |               |                |                |                |                |              |               |               |               |               | Data |        |               |                |                |                |                |              |               |               |               |               |      |   |
|--------|---------------|----------------|----------------|----------------|----------------|--------------|---------------|---------------|---------------|---------------|------|--------|---------------|----------------|----------------|----------------|----------------|--------------|---------------|---------------|---------------|---------------|------|---|
| R10    | SIVmac239 Gag | SIVmac239 Env1 | SIVmac239 Env2 | SIVmac239 Pol1 | SIVmac239 Pol2 | SIVsm543 Gag | SIVsm543 Env1 | SIVsm543 Env2 | SIVsm543 Pol1 | SIVsm543 Pol2 | PHAM | R10    | SIVmac239 Gag | SIVmac239 Env1 | SIVmac239 Env2 | SIVmac239 Pol1 | SIVmac239 Pol2 | SIVsm543 Gag | SIVsm543 Env1 | SIVsm543 Env2 | SIVsm543 Pol1 | SIVsm543 Pol2 | PHAM |   |
| 1      | 1             | 1              | 1              | 1              | 0              | 1            | 0             | 0             | 1             | 0             | *    | 217-10 | 1             | 0              | 1              | 1              | 1              | 0            | 1             | 0             | 0             | 1             | 1    | * |
| 1      | 1             | 0              | 1              | 2              | 1              | 1            | 1             | 0             | 1             | 1             | *    | 224-10 | 1             | 1              | 1              | 0              | 0              | 0            | 0             | 0             | 0             | 0             | 0    | * |
| 1      | 0             | 1              | 1              | 1              | 1              | 1            | 0             | 0             | 0             | 0             | **   | 228-10 | 0             | 1              | 0              | 1              | 2              | 1            | 1             | 0             | 0             | 2             | 0    | * |
| 1      | 1             | 3              | 1              | 5              | 2              | 2            | 3             | 0             | 0             | 2             | **   | 230-10 | 2             | 0              | 1              | 0              | 1              | 1            | 0             | 0             | 0             | 0             | 0    | * |
| 1      | 4             | 2              | 2              | 2              | 4              | 3            | 1             | 3             | 0             | 0             | **   | 236-10 | 1             | 1              | 2              | 1              | 5              | 2            | 2             | 4             | 0             | 0             | 3    | * |
| 1      | 2             | 1              | 1              | 4              | 1              | 1            | 0             | 0             | 1             | 1             | **   | 237-10 | 1             | 2              | 1              | 0              | 1              | 1            | 0             | 0             | 0             | 1             | 1    | * |
| 0      | 1             | 1              | 1              | 3              | 1              | 1            | 0             | 1             | 0             | 0             | *    | 238-10 | 0             | 1              | 0              | 1              | 5              | 0            | 1             | 0             | 0             | 0             | 1    | * |
| 1      | 1             | 1              | 0              | 1              | 1              | 2            | 1             | 2             | 0             | 1             | *    | 241-10 | 1             | 1              | 1              | 1              | 1              | 2            | 1             | 1             | 2             | 0             | 1    | * |
| 0      | 1             | 1              | 0              | 1              | 0              | 0            | 1             | 1             | 1             | 1             | *    | 242-10 | 0             | 0              | 0              | 0              | 1              | 0            | 0             | 0             | 0             | 1             | 0    | * |
| 1      | 2             | 0              | 0              | 1              | 1              | 0            | 0             | 0             | 0             | 0             | **   | 243-10 | 0             | 1              | 1              | 0              | 1              | 0            | 0             | 1             | 1             | 0             | 0    | * |
|        |               |                |                |                |                |              |               |               |               |               |      | 243-10 | 0             | 1              | 0              | 0              | 1              | 1            | 0             | 0             | 0             | 0             | 0    | * |

**Raw ELISPOT Data (Spot-Forming Cells / 200,000 PBMC)**  
**Week 48**

**Ad/Ad**

| R10 | Median        |                |                |                |                |             |              |              |              |              | Data |        |               |                |                |                |                |             |              |              |              |              |      |     |     |
|-----|---------------|----------------|----------------|----------------|----------------|-------------|--------------|--------------|--------------|--------------|------|--------|---------------|----------------|----------------|----------------|----------------|-------------|--------------|--------------|--------------|--------------|------|-----|-----|
|     | SIvmac239 Gag | SIvmac239 Env1 | SIvmac239 Env2 | SIvmac239 Pol1 | SIvmac239 Pol2 | SIvm543 Gag | SIvm543 Env1 | SIvm543 Env2 | SIvm543 Pol1 | SIvm543 Pol2 | PHAM | R10    | SIvmac239 Gag | SIvmac239 Env1 | SIvmac239 Env2 | SIvmac239 Pol1 | SIvmac239 Pol2 | SIvm543 Gag | SIvm543 Env1 | SIvm543 Env2 | SIvm543 Pol1 | SIvm543 Pol2 | PHAM |     |     |
| 1   | 71            | 13             | 14             | 17             | 5              | 63          | 5            | 8            | 12           | 6            | 272  | 218-10 | 1             | 80             | 19             | 11             | 39             | 4           | 62           | 7            | 13           | 13           | 6    | 255 |     |
| 0   | 24            | 114            | 5              | 100            | 4              | 9           | 64           | 4            | 65           | 2            | 191  | 218-10 | 2             | 52             | 12             | 17             | 34             | 4           | 64           | 5            | 10           | 5            | 229  |     |     |
| 1   | 11            | 87             | 8              | 25             | 80             | 5           | 8            | 1            | 24           | 10           | 185  | 220-10 | 0             | 16             | 111            | 8              | 56             | 3           | 65           | 2            | 20           | 2            | 174  |     |     |
| 4   | 40            | 8              | 8              | 12             | 4              | 31          | 7            | 7            | 8            | 3            | 264  | 222-10 | 0             | 10             | 82             | 11             | 39             | 26          | 4            | 6            | 2            | 15           | 11   | 194 |     |
| 3   | 44            | 27             | 8              | 10             | 5              | 30          | 12           | 16           | 4            | 7            | 250  | 223-10 | 1             | 43             | 31             | 9              | 10             | 4           | 32           | 4            | 5            | 2            | 4    | 275 |     |
| 2   | 68            | 57             | 37             | 13             | 18             | 75          | 15           | 27           | 9            | 7            | 183  | 226-10 | 2             | 27             | 6              | 4              | 13             | 4           | 30           | 8            | 9            | 14           | 1    | 271 |     |
| 2   | 5             | 16             | 20             | 9              | 15             | 6           | 3            | 16           | 4            | 6            | 275  | 227-10 | 3             | 39             | 22             | 7              | 6              | 2           | 31           | 11           | 13           | 3            | 6    | 245 |     |
| 0   | 12            | 11             | 7              | 16             | 4              | 6           | 2            | 4            | 6            | 1            | 195  | 227-10 | 2             | 67             | 48             | 15             | 11             | 16          | 64           | 15           | 24           | 11           | 9    | 180 |     |
| 1   | 12            | 9              | 20             | 12             | 7              | 4           | 6            | 14           | 2            | 0            | 265  | 229-10 | 1             | 6              | 15             | 18             | 7              | 16          | 5            | 1            | 10           | 3            | 4    | 279 |     |
| 2   | 61            | 22             | 38             | 24             | 58             | 42          | 18           | 3            | 6            | 33           | 291  | 230-10 | 2             | 3              | 16             | 22             | 31             | 13          | 7            | 4            | 22           | 4            | 4    | 284 |     |
|     |               |                |                |                |                |             |              |              |              |              |      | 234-10 | 1             | 16             | 9              | 6              | 11             | 1           | 6            | 1            | 4            | 5            | 0    | 214 |     |
|     |               |                |                |                |                |             |              |              |              |              |      | 234-10 | 0             | 16             | 12             | 25             | 21             | 6           | 6            | 3            | 3            | 6            | 1    | 175 |     |
|     |               |                |                |                |                |             |              |              |              |              |      | 244-10 | 1             | 14             | 10             | 15             | 14             | 6           | 4            | 6            | 14           | 3            | 0    | 284 |     |
|     |               |                |                |                |                |             |              |              |              |              |      | 245-10 | 2             | 62             | 19             | 31             | 26             | 64          | 36           | 22           | 4            | 7            | 33   | 307 |     |
|     |               |                |                |                |                |             |              |              |              |              |      | 245-10 | 1             | 60             | 25             | 45             | 22             | 52          | 48           | 33           | 1            | 4            | 4    | 33  | 274 |

**Ad/Env**

| R10 | Median        |                |                |                |                |             |              |              |              |              | Data |        |               |                |                |                |                |             |              |              |              |              |      |     |     |
|-----|---------------|----------------|----------------|----------------|----------------|-------------|--------------|--------------|--------------|--------------|------|--------|---------------|----------------|----------------|----------------|----------------|-------------|--------------|--------------|--------------|--------------|------|-----|-----|
|     | SIvmac239 Gag | SIvmac239 Env1 | SIvmac239 Env2 | SIvmac239 Pol1 | SIvmac239 Pol2 | SIvm543 Gag | SIvm543 Env1 | SIvm543 Env2 | SIvm543 Pol1 | SIvm543 Pol2 | PHAM | R10    | SIvmac239 Gag | SIvmac239 Env1 | SIvmac239 Env2 | SIvmac239 Pol1 | SIvmac239 Pol2 | SIvm543 Gag | SIvm543 Env1 | SIvm543 Env2 | SIvm543 Pol1 | SIvm543 Pol2 | PHAM |     |     |
| 1   | 14            | 94             | 58             | 10             | 11             | 5           | 14           | 83           | 6            | 6            | 333  | 219-10 | 2             | 11             | 87             | 48             | 11             | 19          | 4            | 14           | 9            | 5            | 334  |     |     |
| 1   | 90            | 75             | 103            | 38             | 23             | 47          | 25           | 54           | 23           | 26           | 312  | 221-10 | 0             | 17             | 103            | 67             | 8              | 12          | 6            | 36           | 75           | 2            | 6    | 331 |     |
| 0   | 10            | 56             | 32             | 4              | 7              | 13          | 36           | 25           | 6            | 3            | 262  | 225-10 | 0             | 80             | 78             | 83             | 28             | 23          | 18           | 31           | 62           | 23           | 26   | 316 |     |
| 2   | 89            | 60             | 51             | 34             | 12             | 86          | 2            | 31           | 21           | 6            | 247  | 225-10 | 1             | 69             | 72             | 122            | 47             | 22          | 35           | 29           | 46           | 3            | 28   | 307 |     |
| 0   | 6             | 15             | 113            | 11             | 5              | 5           | 4            | 17           | 3            | 2            | 122  | 230-10 | 0             | 13             | 62             | 33             | 6              | 9           | 9            | 25           | 32           | 7            | 4    | 254 |     |
| 4   | 151           | 189            | 260            | 45             | 120            | 155         | 17           | 178          | 19           | 73           | 268  | 232-10 | 4             | 67             | 54             | 53             | 26             | 13          | 81           | 1            | 29           | 25           | 69   | 338 |     |
| 1   | 10            | 59             | 65             | 16             | 13             | 10          | 10           | 46           | 7            | 7            | 295  | 232-10 | 0             | 81             | 65             | 49             | 41             | 11          | 32           | 3            | 17           | 2            | 235  |     |     |
| 1   | 15            | 84             | 75             | 75             | 44             | 18          | 18           | 50           | 7            | 36           | 227  | 233-10 | 0             | 5              | 15             | 124            | 14             | 4           | 6            | 3            | 20           | 6            | 2    | 136 |     |
| 5   | 55            | 125            | 156            | 43             | 6              | 51          | 13           | 147          | 18           | 3            | 293  | 234-10 | 2             | 6              | 14             | 100            | 8              | 5           | 14           | 0            | 6            | 0            | 1    | 137 |     |
| 2   | 27            | 163            | 53             | 17             | 21             | 10          | 46           | 42           | 13           | 7            | 313  | 235-10 | 1             | 160            | 176            | 239            | 44             | 108         | 149          | 14           | 171          | 19           | 74   | 295 |     |
|     |               |                |                |                |                |             |              |              |              |              |      | 235-10 | 2             | 141            | 202            | 280            | 46             | 112         | 161          | 159          | 184          | 18           | 72   | 241 |     |
|     |               |                |                |                |                |             |              |              |              |              |      | 236-10 | 0             | 10             | 55             | 74             | 19             | 10          | 9            | 19           | 40           | 6            | 3    | 302 |     |
|     |               |                |                |                |                |             |              |              |              |              |      | 236-10 | 1             | 9              | 63             | 56             | 12             | 16          | 10           | 52           | 5            | 10           | 288  |     |     |
|     |               |                |                |                |                |             |              |              |              |              |      | 231-10 | 0             | 18             | 90             | 84             | 70             | 49          | 16           | 22           | 54           | 7            | 35   | 208 |     |
|     |               |                |                |                |                |             |              |              |              |              |      | 240-10 | 2             | 21             | 77             | 77             | 66             | 71          | 39           | 20           | 14           | 35           | 7    | 37  | 246 |
|     |               |                |                |                |                |             |              |              |              |              |      | 240-10 | 4             | 55             | 141            | 154            | 49             | 7           | 50           | 146          | 12           | 1            | 1    | 289 |     |
|     |               |                |                |                |                |             |              |              |              |              |      | 246-10 | 2             | 46             | 109            | 147            | 37             | 5           | 54           | 148          | 24           | 4            | 4    | 297 |     |
|     |               |                |                |                |                |             |              |              |              |              |      | 246-10 | 1             | 30             | 164            | 155            | 36             | 22          | 11           | 49           | 17           | 14           | 9    | 335 |     |
|     |               |                |                |                |                |             |              |              |              |              |      | 246-10 | 1             | 23             | 162            | 50             | 18             | 19          | 8            | 43           | 36           | 12           | 11   | 291 |     |

**Sham**

| R10 | Median        |                |                |                |                |             |              |              |              |              | Data |        |               |                |                |                |                |             |              |              |              |              |      |     |
|-----|---------------|----------------|----------------|----------------|----------------|-------------|--------------|--------------|--------------|--------------|------|--------|---------------|----------------|----------------|----------------|----------------|-------------|--------------|--------------|--------------|--------------|------|-----|
|     | SIvmac239 Gag | SIvmac239 Env1 | SIvmac239 Env2 | SIvmac239 Pol1 | SIvmac239 Pol2 | SIvm543 Gag | SIvm543 Env1 | SIvm543 Env2 | SIvm543 Pol1 | SIvm543 Pol2 | PHAM | R10    | SIvmac239 Gag | SIvmac239 Env1 | SIvmac239 Env2 | SIvmac239 Pol1 | SIvmac239 Pol2 | SIvm543 Gag | SIvm543 Env1 | SIvm543 Env2 | SIvm543 Pol1 | SIvm543 Pol2 | PHAM |     |
| 2   | 2             | 2              | 3              | 22             | 4              | 2           | 1            | 2            | 1            | 1            | 298  | 217-10 | 0             | 0              | 1              | 2              | 19             | 4           | 1            | 1            | 0            | 0            | 104  |     |
| 5   | 1             | 2              | 1              | 21             | 6              | 1           | 1            | 1            | 1            | 1            | 417  | 224-10 | 3             | 3              | 3              | 3              | 25             | 3           | 2            | 0            | 3            | 2            | 1    | 292 |
| 0   | 0             | 2              | 6              | 0              | 1              | 2           | 0            | 1            | 2            | 1            | 301  | 224-10 | 4             | 1              | 0              | 0              | 8              | 0           | 1            | 0            | 1            | 0            | 1    | 424 |
| 1   | 1             | 4              | 4              | 3              | 1              | 1           | 6            | 0            | 2            | 1            | 323  | 229-10 | 0             | 0              | 0              | 5              | 0              | 0           | 2            | 0            | 0            | 1            | 1    | 420 |
| 1   | 1             | 0              | 4              | 1              | 3              | 6           | 1            | 0            | 2            | 0            | 247  | 229-10 | 0             | 0              | 3              | 6              | 0              | 2           | 1            | 0            | 1            | 3            | 1    | 304 |
| 1   | 1             | 1              | 1              | 4              | 1              | 0           | 2            | 0            | 0            | 0            | 289  | 230-10 | 1             | 1              | 3              | 2              | 3              | 0           | 2            | 4            | 0            | 3            | 1    | 297 |
| 1   | 1             | 2              | 1              | 3              | 2              | 1           | 0            | 1            | 0            | 0            | 285  | 236-10 | 0             | 0              | 0              | 4              | 0              | 0           | 7            | 0            | 0            | 3            | 0    | 313 |
| 1   | 1             | 2              | 3              | 2              | 2              | 0           | 3            | 1            | 1            | 1            | 247  | 236-10 | 1             | 1              | 1              | 1              | 2              | 0           | 5            | 1            | 0            | 3            | 0    | 288 |
| 1   | 2             | 2              | 3              | 2              | 2              | 0           | 3            | 1            | 1            | 1            | 247  | 237-10 | 1             | 1              | 1              | 1              | 2              | 0           | 2            | 0            | 0            | 0            | 0    | 160 |
| 1   | 2             | 1              | 2              | 9              | 34             | 1           | 1            | 1            | 1            | 0            | 338  | 237-10 | 1             | 1              | 0              | 1              | 4              | 1           | 1            | 0            | 0            | 0            | 0    | 289 |
| 1   | 1             | 0              | 2              | 8              | 5              | 1           | 1            | 1            | 1            | 0            | 320  | 238-10 | 1             | 1              | 1              | 1              | 1              | 1           | 0            | 0            | 0            | 0            | 0    | 307 |
|     |               |                |                |                |                |             |              |              |              |              |      | 241-10 | 0             | 0              | 1              | 2              | 4              | 1           | 0            | 2            | 2            | 1            | 1    | 245 |
|     |               |                |                |                |                |             |              |              |              |              |      | 242-10 | 0             | 2              | 1              | 1              | 10             | 0           | 1            | 1            | 0            | 0            | 0    | 152 |
|     |               |                |                |                |                |             |              |              |              |              |      | 243-10 | 1             | 3              | 0              | 2              | 8              | 67          | 0            | 1            | 1            | 1            | 0    | 134 |
|     |               |                |                |                |                |             |              |              |              |              |      | 243-10 | 0             | 0              | 0              | 0              | 0              | 3           | 4            | 0            | 1            | 1            | 0    | 114 |
|     |               |                |                |                |                |             |              |              |              |              |      | 243-10 | 1             | 1              | 0              | 3              | 11             | 5           | 1            | 0            | 0            | 0            | 0    | 125 |



**Raw ELISPOT Data (Spot-Forming Cells / 200,000 PBMC)**  
**Week 56**

**Ad/Ad**

| Median |               |                |                |                |                |              |               |               |               |               | Data |        |               |                |                |                |                |              |               |               |               |               |      |     |     |     |
|--------|---------------|----------------|----------------|----------------|----------------|--------------|---------------|---------------|---------------|---------------|------|--------|---------------|----------------|----------------|----------------|----------------|--------------|---------------|---------------|---------------|---------------|------|-----|-----|-----|
| R10    | SIVmac239 Gag | SIVmac239 Env1 | SIVmac239 Env2 | SIVmac239 Pol1 | SIVmac239 Pol2 | SIVsm543 Gag | SIVsm543 Env1 | SIVsm543 Env2 | SIVsm543 Pol1 | SIVsm543 Pol2 | PHAM | R10    | SIVmac239 Gag | SIVmac239 Env1 | SIVmac239 Env2 | SIVmac239 Pol1 | SIVmac239 Pol2 | SIVsm543 Gag | SIVsm543 Env1 | SIVsm543 Env2 | SIVsm543 Pol1 | SIVsm543 Pol2 | PHAM |     |     |     |
| 1      | 49            | 11             | 6              | 19             | 5              | 44           | 1             | 5             | 6             | 3             | 685  | 218-10 | 1             | 38             | 12             | 4              | 21             | 6            | 34            | 1             | 5             | 7             | 712  |     |     |     |
| 2      | 32            | 113            | 5              | 120            | 8              | 5            | 68            | 2             | 67            | 0             | 450  | 218-10 | 2             | 39             | 12             | 6              | 16             | 3            | 34            | 1             | 5             | 7             | 638  |     |     |     |
| 0      | 9             | 55             | 3              | 23             | 55             | 7            | 0             | 1             | 9             | 2             | 449  | 220-10 | 1             | 36             | 117            | 5              | 125            | 11           | 6             | 23            | 1             | 74            | 0    | 466 |     |     |
| 2      | 39            | 7              | 4              | 9              | 6              | 32           | 4             | 9             | 9             | 2             | 526  | 222-10 | 0             | 0              | 0              | 4              | 20             | 0            | 0             | 0             | 1             | 11            | 2    | 465 |     |     |
| 0      | 29            | 9              | 8              | 3              | 2              | 23           | 9             | 8             | 2             | 3             | 599  | 223-10 | 3             | 34             | 9              | 3              | 8              | 8            | 35            | 5             | 12            | 8             | 1    | 538 |     |     |
| 0      | 38            | 12             | 16             | 6              | 4              | 24           | 7             | 5             | 0             | 3             | 393  | 226-10 | 0             | 25             | 9              | 4              | 10             | 4            | 2             | 25            | 0             | 10            | 0    | 4   | 605 |     |
| 1      | 2             | 7              | 10             | 4              | 9              | 2            | 1             | 11            | 3             | 4             | 533  | 227-10 | 0             | 32             | 8              | 8              | 1              | 2            | 20            | 8             | 5             | 3             | 2    | 593 |     |     |
| 0      | 5             | 9              | 6              | 6              | 0              | 4            | 2             | 3             | 5             | 1             | 274  | 227-10 | 0             | 41             | 14             | 16             | 3              | 1            | 23            | 3             | 6             | 0             | 0    | 3   | 393 |     |
| 2      | 25            | 15             | 19             | 21             | 4              | 5            | 6             | 18            | 2             | 2             | 483  | 229-10 | 0             | 55             | 10             | 15             | 7              | 5            | 25            | 7             | 4             | 0             | 2    | 3   | 393 |     |
| 1      | 36            | 13             | 19             | 9              | 28             | 26           | 7             | 8             | 2             | 27            | 515  | 229-10 | 0             | 1              | 6              | 13             | 3              | 10           | 1             | 0             | 9             | 2             | 3    | 499 |     |     |
|        |               |                |                |                |                |              |               |               |               |               |      | 230-10 | 1             | 2              | 4              | 7              | 4              | 8            | 3             | 2             | 12            | 2             | 4    | 2   | 6   | 567 |
|        |               |                |                |                |                |              |               |               |               |               |      | 230-10 | 0             | 2              | 4              | 7              | 10             | 0            | 4             | 3             | 1             | 6             | 1    | 1   | 317 |     |
|        |               |                |                |                |                |              |               |               |               |               |      | 230-10 | 0             | 8              | 14             | 5              | 2              | 0            | 3             | 1             | 2             | 3             | 0    | 2   | 240 |     |
|        |               |                |                |                |                |              |               |               |               |               |      | 244-10 | 0             | 25             | 18             | 16             | 21             | 2            | 4             | 7             | 15            | 0             | 0    | 3   | 489 |     |
|        |               |                |                |                |                |              |               |               |               |               |      | 244-10 | 4             | 24             | 11             | 22             | 20             | 6            | 5             | 6             | 20            | 3             | 1    | 4   | 476 |     |
|        |               |                |                |                |                |              |               |               |               |               |      | 245-10 | 0             | 37             | 11             | 21             | 12             | 27           | 31            | 4             | 7             | 3             | 24   | 527 |     |     |
|        |               |                |                |                |                |              |               |               |               |               |      | 245-10 | 1             | 34             | 14             | 17             | 5              | 25           | 21            | 9             | 9             | 0             | 0    | 30  | 500 |     |

**Ad/Env**

| Median |               |                |                |                |                |              |               |               |               |               | Data |        |               |                |                |                |                |              |               |               |               |               |      |     |
|--------|---------------|----------------|----------------|----------------|----------------|--------------|---------------|---------------|---------------|---------------|------|--------|---------------|----------------|----------------|----------------|----------------|--------------|---------------|---------------|---------------|---------------|------|-----|
| R10    | SIVmac239 Gag | SIVmac239 Env1 | SIVmac239 Env2 | SIVmac239 Pol1 | SIVmac239 Pol2 | SIVsm543 Gag | SIVsm543 Env1 | SIVsm543 Env2 | SIVsm543 Pol1 | SIVsm543 Pol2 | PHAM | R10    | SIVmac239 Gag | SIVmac239 Env1 | SIVmac239 Env2 | SIVmac239 Pol1 | SIVmac239 Pol2 | SIVsm543 Gag | SIVsm543 Env1 | SIVsm543 Env2 | SIVsm543 Pol1 | SIVsm543 Pol2 | PHAM |     |
| 0      | 9             | 82             | 36             | 5              | 7              | 7            | 10            | 78            | 4             | 2             | 584  | 219-10 | 0             | 12             | 32             | 23             | 7              | 7            | 9             | 85            | 4             | 0             | 0    | 563 |
| 0      | 126           | 68             | 107            | 42             | 22             | 51           | 31            | 47            | 16            | 20            | 472  | 219-10 | 0             | 6              | 71             | 42             | 2              | 6            | 31            | 75            | 3             | 3             | 0    | 605 |
| 2      | 20            | 145            | 110            | 7              | 15             | 20           | 53            | 59            | 3             | 4             | 510  | 221-10 | 0             | 110            | 84             | 108            | 48             | 23           | 54            | 43            | 44            | 12            | 25   | 465 |
| 1      | 66            | 46             | 37             | 41             | 8              | 63           | 4             | 18            | 23            | 4             | 374  | 221-10 | 0             | 111            | 81             | 105            | 39             | 21           | 47            | 39            | 49            | 19            | 18   | 479 |
| 1      | 5             | 30             | 93             | 11             | 5              | 4            | 12            | 20            | 7             | 3             | 295  | 225-10 | 1             | 35             | 112            | 102            | 4              | 15           | 54            | 46            | 64            | 1             | 1    | 530 |
| 2      | 129           | 192            | 194            | 22             | 85             | 119          | 17            | 194           | 22            | 40            | 559  | 230-10 | 1             | 25             | 152            | 118            | 10             | 10           | 26            | 59            | 54            | 4             | 4    | 490 |
| 2      | 5             | 35             | 52             | 14             | 8              | 3            | 7             | 36            | 3             | 3             | 514  | 230-10 | 1             | 46             | 54             | 40             | 40             | 9            | 71            | 4             | 22            | 23            | 6    | 381 |
| 0      | 13            | 59             | 44             | 39             | 37             | 10           | 12            | 22            | 11            | 28            | 484  | 230-10 | 0             | 65             | 37             | 13             | 34             | 6            | 55            | 4             | 9             | 24            | 3    | 361 |
| 3      | 26            | 71             | 162            | 14             | 4              | 33           | 8             | 95            | 13            | 2             | 534  | 233-10 | 0             | 6              | 26             | 92             | 8              | 1            | 4             | 12            | 15            | 10            | 2    | 318 |
| 2      | 29            | 144            | 77             | 13             | 13             | 18           | 28            | 51            | 17            | 6             | 587  | 234-10 | 1             | 4              | 14             | 34             | 14             | 4            | 11            | 24            | 4             | 4             | 3    | 273 |
|        |               |                |                |                |                |              |               |               |               |               |      | 234-10 | 2             | 116            | 206            | 178            | 48             | 80           | 126           | 15            | 195           | 29            | 47   | 576 |
|        |               |                |                |                |                |              |               |               |               |               |      | 235-10 | 2             | 121            | 178            | 209            | 25             | 89           | 111           | 29            | 193           | 14            | 33   | 542 |
|        |               |                |                |                |                |              |               |               |               |               |      | 235-10 | 2             | 4              | 39             | 48             | 11             | 3            | 3             | 9             | 14            | 6             | 2    | 517 |
|        |               |                |                |                |                |              |               |               |               |               |      | 235-10 | 0             | 12             | 51             | 33             | 47             | 32           | 10            | 33            | 21            | 11            | 33   | 497 |
|        |               |                |                |                |                |              |               |               |               |               |      | 238-10 | 0             | 24             | 66             | 54             | 31             | 42           | 10            | 20            | 22            | 11            | 22   | 470 |
|        |               |                |                |                |                |              |               |               |               |               |      | 240-10 | 0             | 29             | 83             | 160            | 17             | 5            | 37            | 7             | 78            | 9             | 1    | 507 |
|        |               |                |                |                |                |              |               |               |               |               |      | 240-10 | 1             | 28             | 59             | 164            | 11             | 8            | 28            | 8             | 111           | 17            | 6    | 584 |
|        |               |                |                |                |                |              |               |               |               |               |      | 246-10 | 1             | 29             | 152            | 184            | 34             | 11           | 12            | 37            | 150           | 18            | 6    | 585 |
|        |               |                |                |                |                |              |               |               |               |               |      | 246-10 | 2             | 28             | 136            | 70             | 12             | 14           | 23            | 39            | 52            | 16            | 5    | 589 |

**Sham**

| Median |               |                |                |                |                |              |               |               |               |               | Data |        |               |                |                |                |                |              |               |               |               |               |      |     |
|--------|---------------|----------------|----------------|----------------|----------------|--------------|---------------|---------------|---------------|---------------|------|--------|---------------|----------------|----------------|----------------|----------------|--------------|---------------|---------------|---------------|---------------|------|-----|
| R10    | SIVmac239 Gag | SIVmac239 Env1 | SIVmac239 Env2 | SIVmac239 Pol1 | SIVmac239 Pol2 | SIVsm543 Gag | SIVsm543 Env1 | SIVsm543 Env2 | SIVsm543 Pol1 | SIVsm543 Pol2 | PHAM | R10    | SIVmac239 Gag | SIVmac239 Env1 | SIVmac239 Env2 | SIVmac239 Pol1 | SIVmac239 Pol2 | SIVsm543 Gag | SIVsm543 Env1 | SIVsm543 Env2 | SIVsm543 Pol1 | SIVsm543 Pol2 | PHAM |     |
| 1      | 1             | 1              | 2              | 6              | 2              | 0            | 2             | 1             | 0             | 2             | 558  | 217-10 | 0             | 1              | 1              | 0              | 1              | 4            | 0             | 0             | 1             | 0             | 3    | 152 |
| 3      | 1             | 1              | 3              | 5              | 5              | 1            | 1             | 1             | 0             | 1             | 518  | 217-10 | 2             | 1              | 0              | 3              | 3              | 8            | 0             | 0             | 0             | 0             | 1    | 563 |
| 1      | 2             | 0              | 0              | 1              | 2              | 1            | 0             | 0             | 1             | 0             | 504  | 224-10 | 0             | 1              | 0              | 5              | 4              | 4            | 1             | 1             | 1             | 0             | 0    | 518 |
| 2      | 1             | 5              | 3              | 2              | 1              | 1            | 2             | 0             | 1             | 1             | 541  | 228-10 | 0             | 1              | 0              | 0              | 1              | 1            | 1             | 0             | 0             | 1             | 0    | 495 |
| 1      | 2             | 0              | 1              | 0              | 1              | 0            | 0             | 0             | 0             | 0             | 528  | 230-10 | 2             | 2              | 5              | 2              | 2              | 2            | 0             | 0             | 0             | 0             | 0    | 513 |
| 1      | 1             | 0              | 1              | 1              | 1              | 0            | 2             | 1             | 2             | 1             | 557  | 230-10 | 1             | 0              | 0              | 0              | 0              | 0            | 0             | 0             | 0             | 0             | 0    | 532 |
| 1      | 1             | 0              | 1              | 1              | 1              | 1            | 0             | 0             | 1             | 1             | 550  | 236-10 | 1             | 0              | 0              | 1              | 0              | 0            | 0             | 0             | 0             | 0             | 0    | 555 |
| 0      | 0             | 0              | 1              | 3              | 2              | 1            | 0             | 2             | 0             | 0             | 527  | 237-10 | 1             | 1              | 0              | 1              | 1              | 1            | 0             | 2             | 0             | 0             | 1    | 577 |
| 0      | 0             | 1              | 0              | 1              | 0              | 0            | 0             | 0             | 0             | 0             | 340  | 237-10 | 0             | 0              | 0              | 1              | 8              | 1            | 0             | 1             | 1             | 3             | 0    | 587 |
| 1      | 0             | 0              | 0              | 1              | 1              | 1            | 0             | 0             | 1             | 1             | 550  | 238-10 | 1             | 0              | 0              | 0              | 0              | 0            | 0             | 0             | 0             | 0             | 1    | 538 |
| 0      | 0             | 0              | 0              | 1              | 3              | 2            | 1             | 0             | 2             | 0             | 527  | 241-10 | 0             | 0              | 0              | 0              | 2              | 1            | 1             | 0             | 3             | 0             | 0    | 572 |
| 0      | 0             | 0              | 0              | 1              | 0              | 0            | 0             | 0             | 0             | 0             | 340  | 241-10 | 0             | 0              | 0              | 0              | 1              | 2            | 0             | 0             | 0             | 0             | 0    | 482 |
| 1      | 0             | 0              | 0              | 1              | 1              | 1            | 0             | 1             | 0             | 1             | 413  | 242-10 | 0             | 0              | 1              | 0              | 0              | 0            | 0             | 0             | 0             | 0             | 0    | 331 |
|        |               |                |                |                |                |              |               |               |               |               |      | 243-10 | 0             | 0              | 0              | 0              | 1              | 0            | 0             | 0             | 0             | 0             | 0    | 348 |
|        |               |                |                |                |                |              |               |               |               |               |      | 243-10 | 1             | 0              | 0              | 0              | 0              | 1            | 1             | 0             | 0             | 0             | 0    | 422 |
|        |               |                |                |                |                |              |               |               |               |               |      | 243-10 | 0             | 0              | 0              | 0              | 0              | 0            | 1             | 0             | 1             | 0             | 1    | 403 |

**Supplementary Table 2. P values Following Fisher's Exact/Permutation Tests of All Informative Sites**

| Amino Acid Site | Sham vs. Stock   | Ad35/Ad26 vs. Stock | Ad35/Ad26/Env vs. Stock | Ad35/Ad26 vs. Sham | Ad35/Ad26/Env vs. Sham | Ad35/Ad26 vs. Ad35/Ad26/Env | Ad35/Ad26 + Ad35/Ad26/Env vs. Stock | Ad35/Ad26 + Ad35/Ad26/Env vs. Sham |
|-----------------|------------------|---------------------|-------------------------|--------------------|------------------------|-----------------------------|-------------------------------------|------------------------------------|
| 23              | 0.016            | 0.007               | 0.018                   | 0.392              | 0.390                  | 1.000                       | <b>0.001</b>                        | 0.258                              |
| 45              | 0.013            | <b>&lt;0.001</b>    | <b>0.002</b>            | 0.032              | 0.090                  | 1.000                       | <b>&lt;0.001</b>                    | 0.013                              |
| 47              | 0.181            | <b>&lt;0.001</b>    | <b>&lt;0.001</b>        | <b>0.001</b>       | 0.007                  | 1.000                       | <b>&lt;0.001</b>                    | <b>&lt;0.001</b>                   |
| 70              | <b>&lt;0.001</b> | <b>&lt;0.001</b>    | <b>&lt;0.001</b>        | <b>0.001</b>       | 0.008                  | 1.000                       | <b>&lt;0.001</b>                    | <b>&lt;0.001</b>                   |
| 130             | 0.670            | 0.653               | 1.000                   | 0.582              | 1.000                  | 1.000                       | 1.000                               | 0.642                              |
| 132             | 1.000            | 0.768               | 0.449                   | 0.771              | 0.451                  | 1.000                       | 0.427                               | 0.433                              |
| 133             | 0.574            | 0.345               | 0.170                   | 0.650              | 0.103                  | 0.070                       | 1.000                               | 0.679                              |
| 134             | 0.831            | 0.569               | 0.448                   | 0.773              | 0.448                  | 1.000                       | 0.297                               | 0.432                              |
| 137             | 0.670            | 0.380               | 1.000                   | 0.159              | 1.000                  | 0.541                       | 0.688                               | 0.377                              |
| 138             | 0.132            | 0.160               | 0.198                   | 1.000              | 0.034                  | 0.040                       | 0.603                               | 0.371                              |
| 139             | 1.000            | 0.784               | 0.448                   | 0.787              | 0.286                  | 0.647                       | 0.447                               | 0.331                              |
| 140             | 0.481            | 0.652               | 0.055                   | 1.000              | 0.015                  | 0.035                       | 0.680                               | 0.237                              |
| 141             | 0.481            | 0.652               | 0.055                   | 1.000              | 0.015                  | 0.035                       | 0.680                               | 0.237                              |
| 142             | 0.595            | 0.652               | 0.055                   | 1.000              | 0.016                  | 0.035                       | 0.680                               | 0.322                              |
| 143             | 0.598            | 0.821               | 0.032                   | 1.000              | 0.015                  | 0.035                       | 0.540                               | 0.237                              |
| 144             | 0.821            | 1.000               | 0.679                   | 0.771              | 0.451                  | 1.000                       | 0.583                               | 0.433                              |
| 154             | 0.118            | 0.539               | 0.338                   | 0.672              | 1.000                  | 1.000                       | 0.567                               | 0.480                              |
| 161             | 0.038            | 0.784               | 0.105                   | 0.060              | 0.776                  | 0.137                       | 0.644                               | 0.222                              |
| 185             | 0.841            | 0.464               | 1.000                   | 0.326              | 0.740                  | 1.000                       | 0.519                               | 0.387                              |
| 186             | <b>0.005</b>     | 0.539               | 0.019                   | 0.102              | 0.702                  | 0.095                       | 0.157                               | 0.399                              |
| 208             | 1.000            | 1.000               | 1.000                   | 1.000              | 1.000                  | 1.000                       | 1.000                               | 1.000                              |
| 355             | 0.479            | 0.661               | 0.578                   | 1.000              | 1.000                  | 1.000                       | 0.398                               | 1.000                              |
| 380             | 0.306            | 0.436               | 1.000                   | 1.000              | 0.480                  | 0.445                       | 0.501                               | 1.000                              |
| 424             | 0.271            | 0.613               | 0.723                   | 0.164              | 1.000                  | 0.460                       | 1.000                               | 0.318                              |
| 428             | 0.284            | 0.330               | 0.726                   | 0.064              | 1.000                  | 0.285                       | 0.823                               | 0.161                              |
| 433             | 0.644            | 0.763               | 0.679                   | 1.000              | 0.451                  | 0.647                       | 1.000                               | 0.794                              |
| 486             | 0.211            | 1.000               | 0.019                   | 0.319              | 0.136                  | 0.030                       | 0.304                               | 1.000                              |
| 721             | 0.592            | 1.000               | 0.356                   | 1.000              | 0.427                  | 0.375                       | 0.546                               | 1.000                              |
| 726             | 0.497            | 0.320               | 1.000                   | 1.000              | 1.000                  | 1.000                       | 0.411                               | 1.000                              |
| 760             | 1.000            | 1.000               | 0.338                   | 1.000              | 0.437                  | 0.326                       | 1.000                               | 1.000                              |
| 762             | 0.606            | 1.000               | 0.042                   | 1.000              | 0.015                  | 0.030                       | 0.400                               | 0.298                              |
| 763             | 0.536            | 0.303               | 0.035                   | 0.099              | 0.091                  | 0.008                       | 0.715                               | 1.000                              |
| 770             | 1.000            | 0.512               | 0.382                   | 0.519              | 0.386                  | 0.128                       | 1.000                               | 1.000                              |
| 780             | 0.621            | 0.539               | 1.000                   | 1.000              | 1.000                  | 1.000                       | 1.000                               | 1.000                              |
| 805             | 0.494            | 0.391               | 0.019                   | 0.830              | 0.044                  | 0.099                       | 0.079                               | 0.246                              |
| 808             | 0.490            | 0.375               | 0.038                   | 0.660              | 0.080                  | 0.285                       | 0.073                               | 0.232                              |
| 820             | 0.864            | 0.271               | 0.250                   | 0.382              | 0.386                  | 1.000                       | 0.120                               | 0.181                              |
| 830             | 1.000            | 0.549               | 1.000                   | 0.552              | 1.000                  | 1.000                       | 0.267                               | 0.280                              |
| 881             | 0.233            | 0.813               | 1.000                   | 0.601              | 0.502                  | 1.000                       | 0.832                               | 0.495                              |
| 885             | 0.540            | 1.000               | 1.000                   | 0.601              | 0.502                  | 1.000                       | 0.828                               | 0.495                              |
| 888             | 0.160            | 0.813               | 0.759                   | 0.427              | 0.290                  | 0.730                       | 1.000                               | 0.255                              |

Note: After Bonferroni corrections, p-values<0.00625 considered significant
